# Supplementary material for: Monitoring the mechanical responses of tumor metastasis based on a microfluidic chip integrated with an electrochemical detection system
Source: Royal Society of Chemistry journal article supplement (doi:10.1039/d5lc00563a), 2025-01-01
Supplement: d5lc00563a1.pdf [file d5lc00563a1.pdf]

*Supplementary Information*

# Monitoring the Mechanical Responses of Tumor Metastasis Based on a Microfluidic Chip Integrated with an Electrochemical Detection System

Shuqi Chen<sup>a</sup>, Hang Qi<sup>a</sup>, Yuanheng Kuang<sup>a</sup>, Quanning Li<sup>a</sup>, Xuejiao Chen<sup>a</sup> and Yanyan Wang<sup>\*a</sup>

*State Key Laboratory of Precision Measurement Technology and Instruments, College of Precision Instruments and Opto-electronics Engineering, Tianjin University, Tianjin 300072, China*

*\*Corresponding author: yanyanwang@tju.edu.cn*

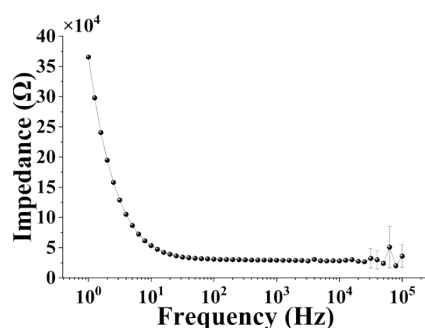

Fig. S1 Impedance spectrum of MDA-MB-231 cells within microchannels.

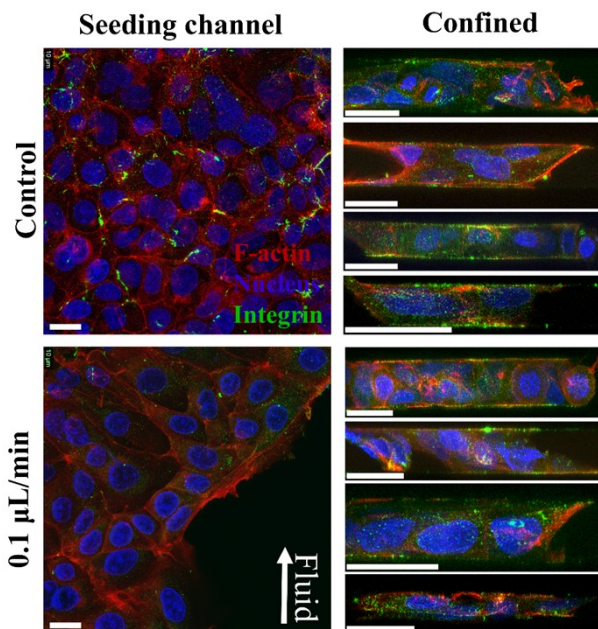

Fig. S2 Immunofluorescence images of nucleus, F-actin and integrin of MCF-7 in different region at static condition (top) and a flow rate of 0.1  $\mu\text{L}/\text{min}$  (bottom), scale bar, 20  $\mu\text{m}$ .

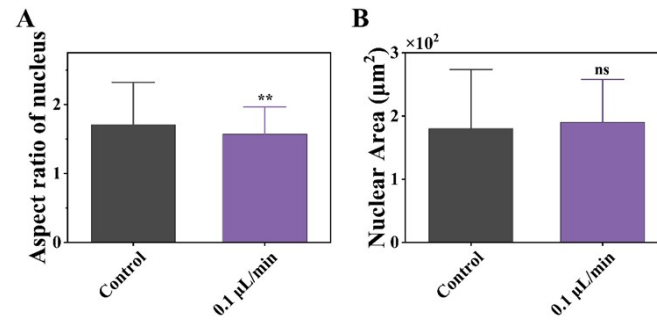

**Fig. S3** Analysis of (A) aspect ratio of nucleus and (B) nuclear area of MCF-7 cells under different fluidic conditions.
